# Supplementary material
Source: PubMed Central journal article supplement (PMC9130250)
Supplement: 41598_2022_12557_MOESM1_ESM.pdf [file 41598_2022_12557_MOESM1_ESM.pdf]

## **Supplementary Information**

**Additional Lab-on-Chip data with updated sigmoidal fitting values for each of the clinical samples tested, as originally presented in Table 1 of the manuscript. Figures S1-13 correspond to the samples H2, H5, H5-hTERT, H7, H7-hTERT, H11, H12, H12-hTERT, H17, H27, H27-hTERT, H45, H45-hTERT respectively.**

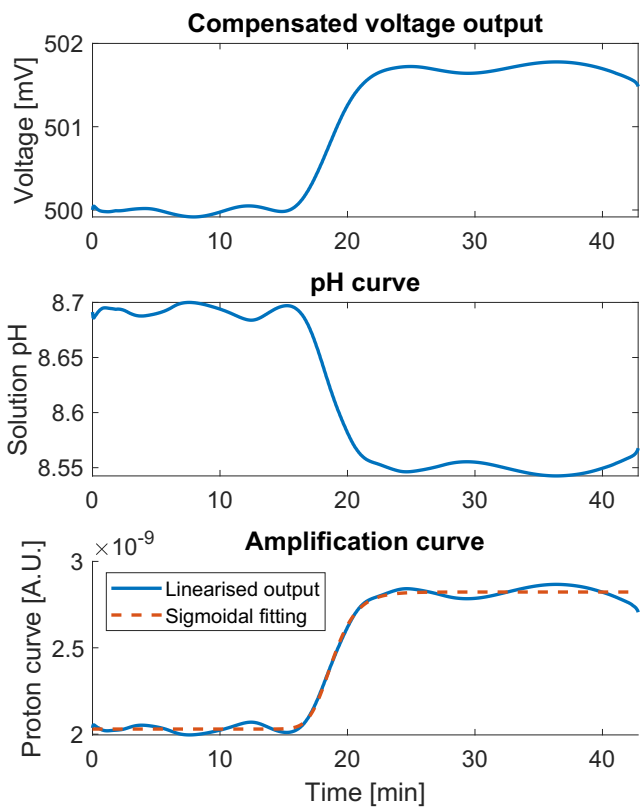

**Figure S1.** H2.

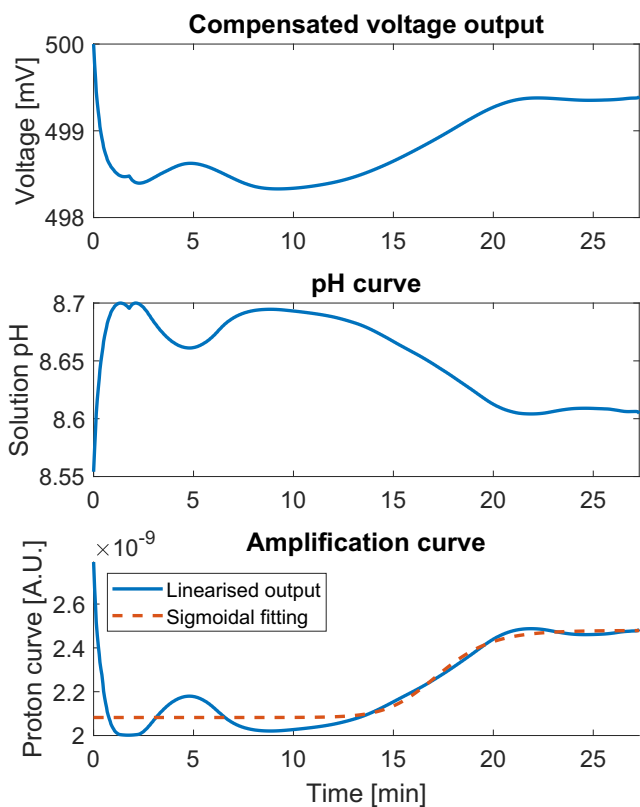

**Figure S2.** H5.

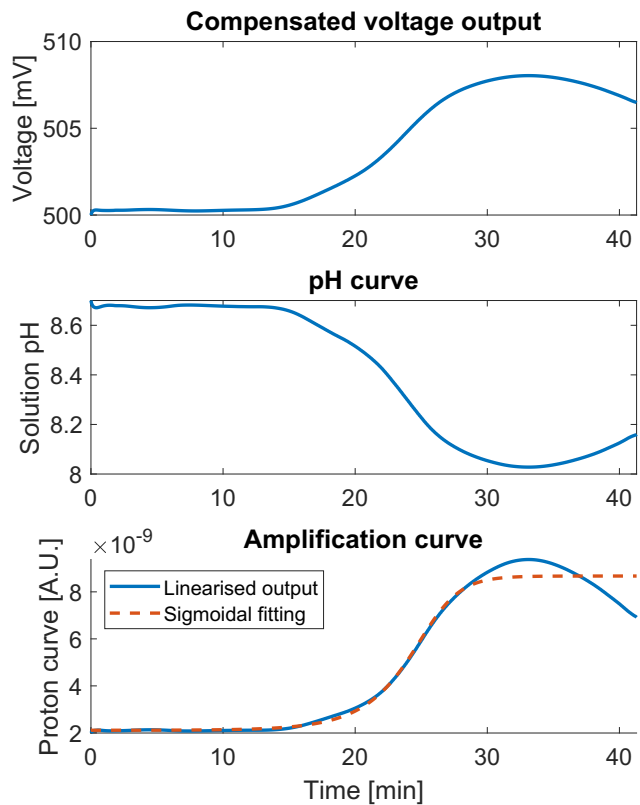

**Figure S3.** H5 hTERT.

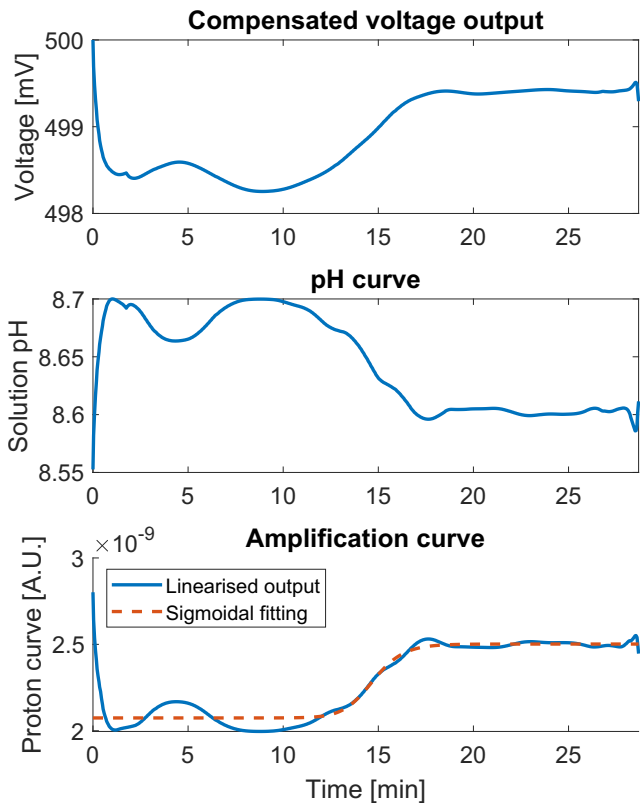

**Figure S4.** H7.

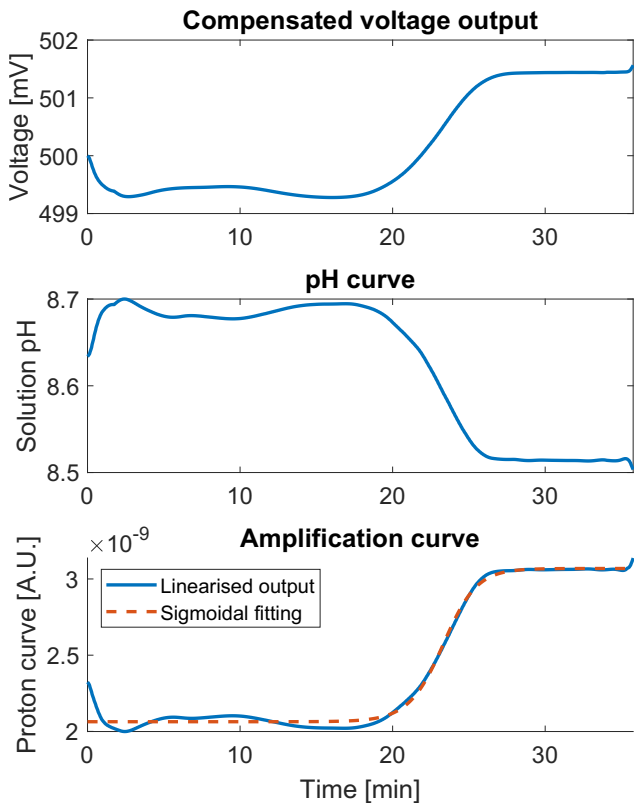

**Figure S5.** H7 hTERT.

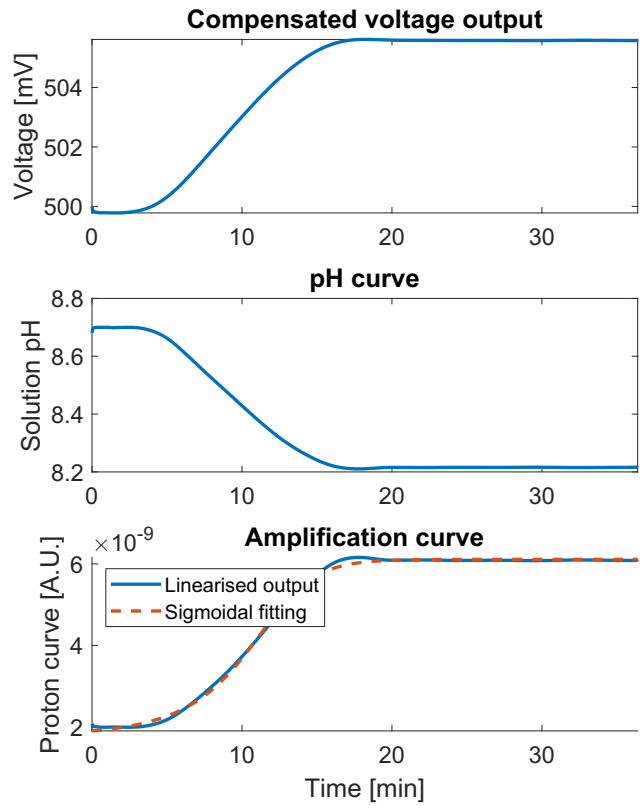

**Figure S6.** H11.

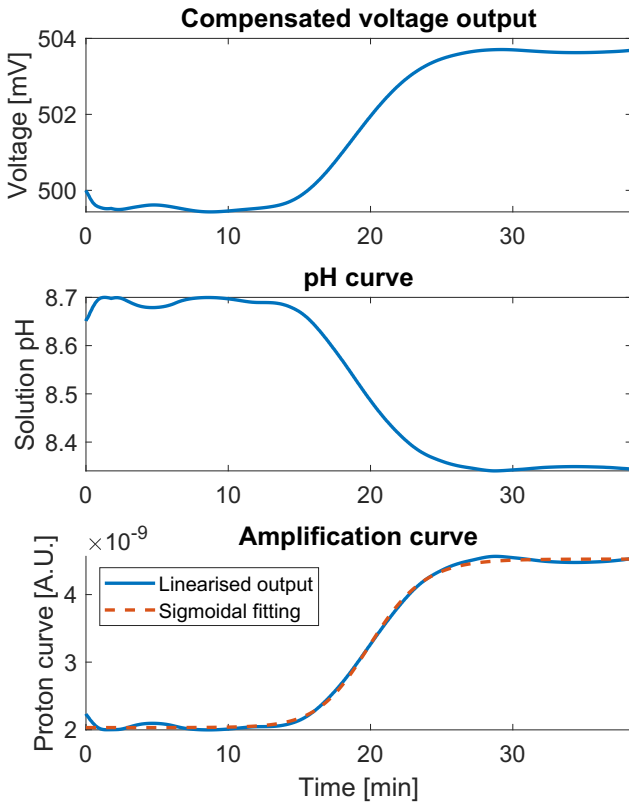

**Figure S7.** H12.

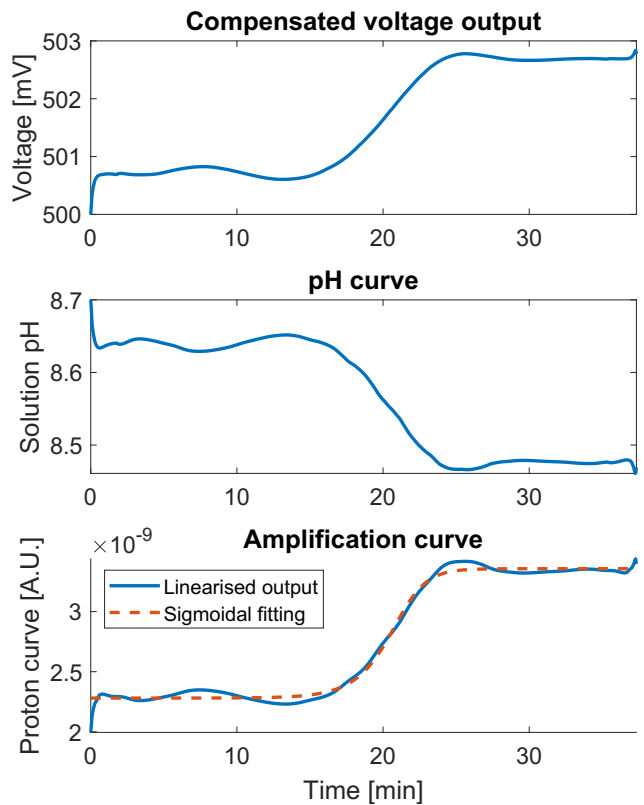

**Figure S8.** H12 hTERT.

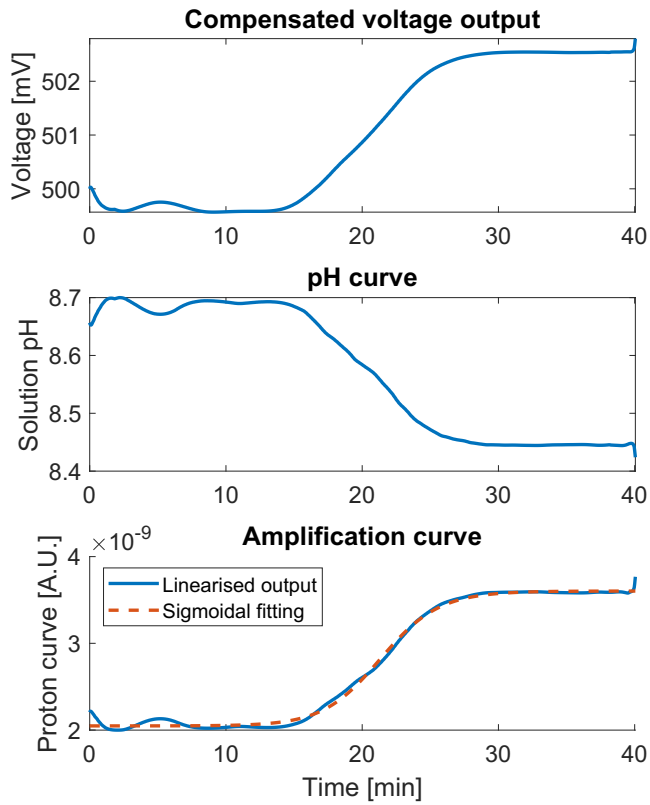

**Figure S9. H17.**

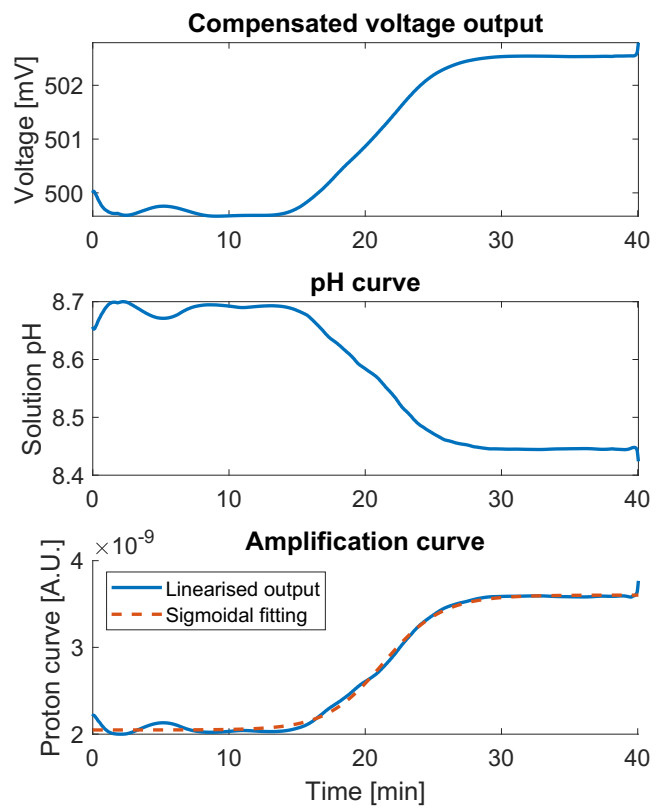

**Figure S10. H27.**

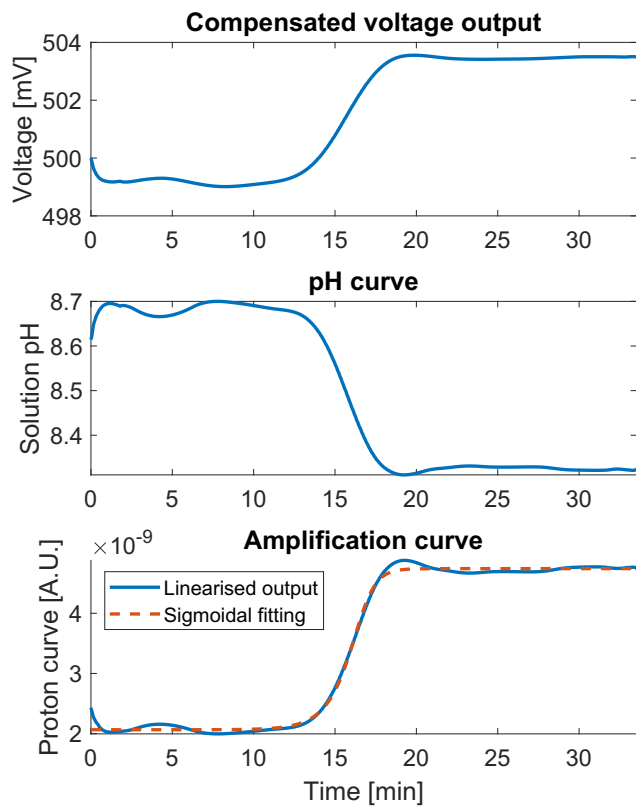

**Figure S11. H27 hTERT.**

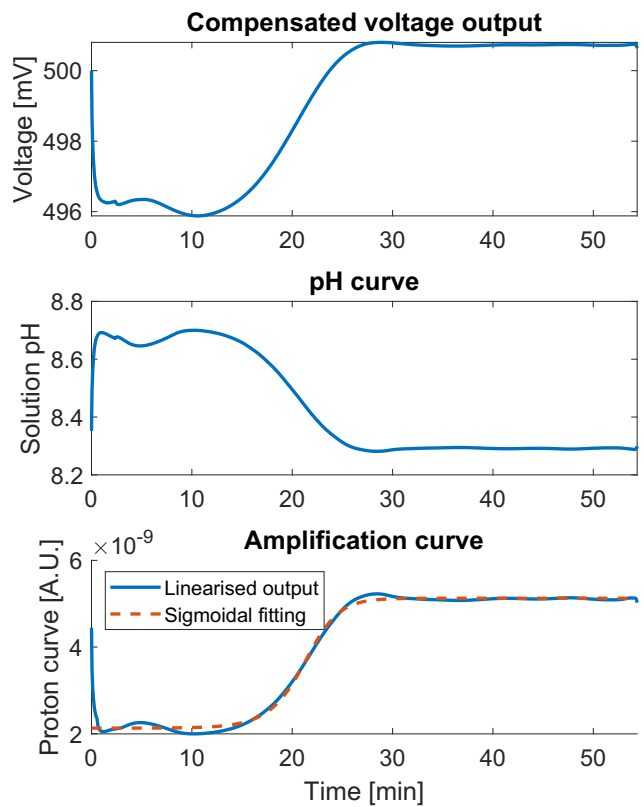

**Figure S12. H45.**

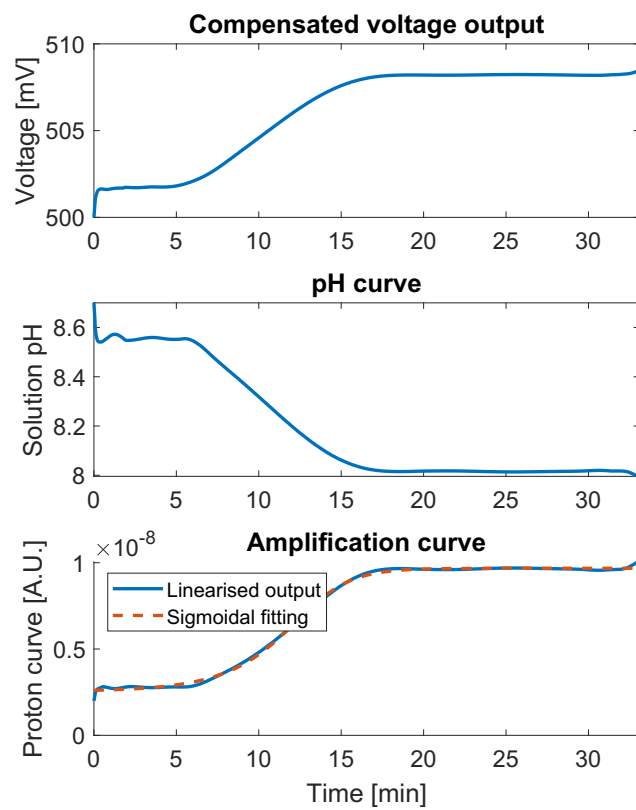

**Figure S13.** H45 hTERT.
